# Supplementary material
Source: PubMed Central journal article supplement (PMC2740446)

# Supplemental Figure 1 Sykes et al.

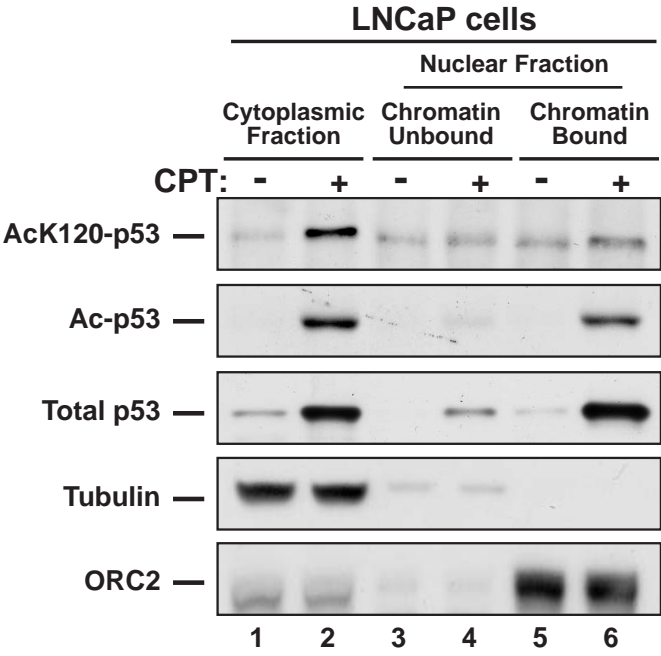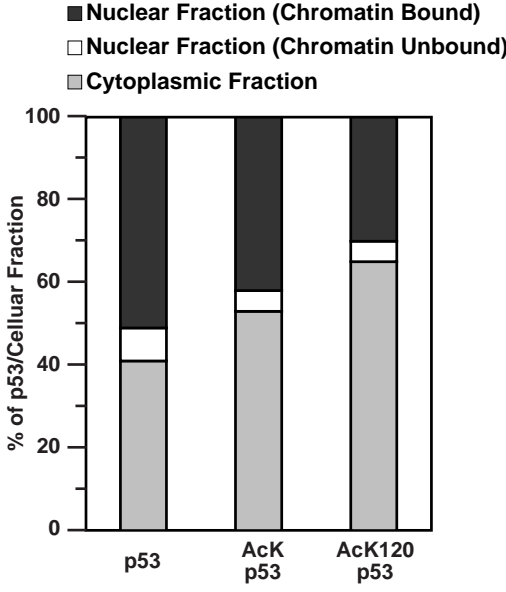

Supplement: supp_M109.026096_jbc.M109.026096-1.pdf [file supp_M109.026096_jbc.M109.026096-1.pdf]

# Supplemental Figure 2 Sykes et al.

## A

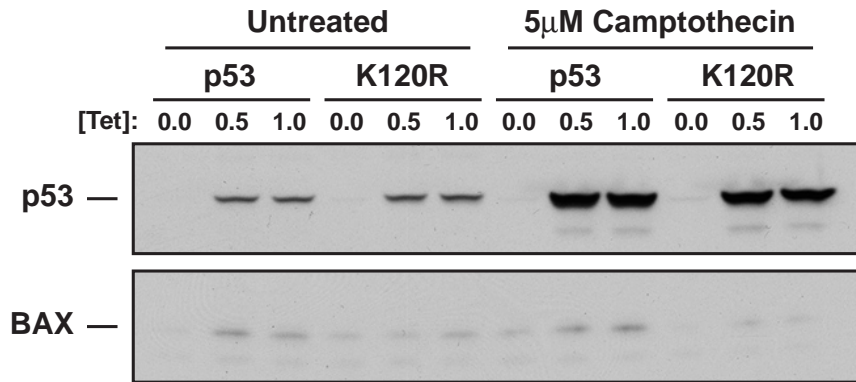

## B

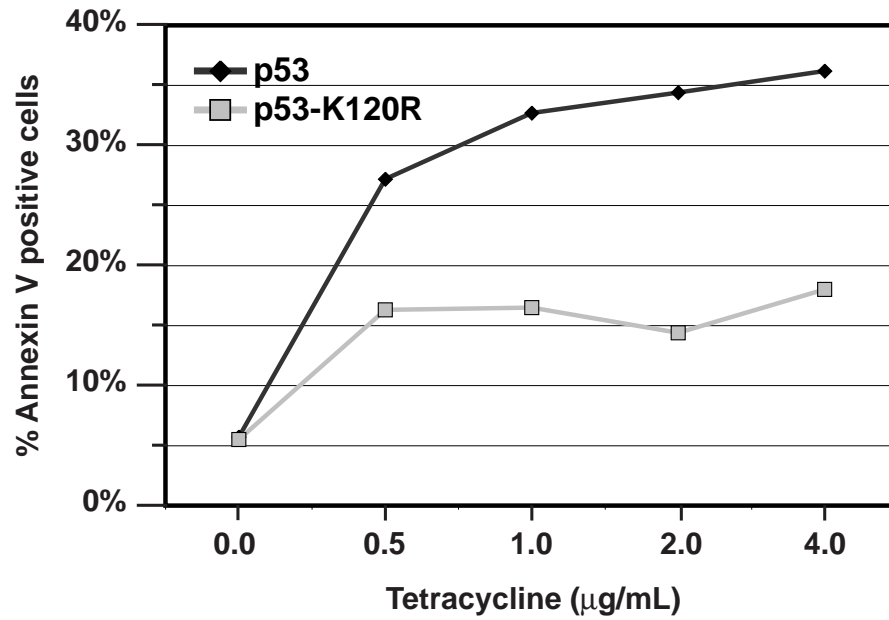

Supplement: supp_M109.026096_jbc.M109.026096-2.pdf [file supp_M109.026096_jbc.M109.026096-2.pdf]
